# Supplementary material for: Improving Solubility and Permeability of Hesperidin through Electrospun Orange-Peel-Extract-Loaded Nanofibers
Source: MDPI journal article supplement (doi:10.3390/ijms24097963), 2023-04-27
Supplement: s1 [file s1]

**Electrospun nanofibers containing orange peel extract  
as an innovative system  
that improves the solubility and permeability of hesperidin**

Supplementary material

Table S1. HPLC method validation parameters

|                                       | flavan-3-ols  |               |               | flavanols     |               | phenolic acids | flavanones    |               |               | flavone       |               |
|---------------------------------------|---------------|---------------|---------------|---------------|---------------|----------------|---------------|---------------|---------------|---------------|---------------|
|                                       | catechin      | epicatechin   | quercetin     | rutin         | kaempferol    | caffeic acid   | hesperetin    | hesperidin    | naringenin    | naringin      | luteolin      |
| Detection wavelength [nm]             | 280           | 280           | 360           | 360           | 360           | 330            | 280           | 280           | 280           | 280           | 330           |
| Linerity a ± S <sub>a</sub>           | 0.174 ± 0.001 | 0.108 ± 0.001 | 0.521 ± 0.025 | 0.225 ± 0.002 | 0.463 ± 0.006 | 0.809 ± 0.024  | 0.442 ± 0.011 | 0.102 ± 0.006 | 0.400 ± 0.018 | 0.242 ± 0.004 | 0.512 ± 0.022 |
| b ± S <sub>b</sub>                    | insignificant | insignificant | insignificant | insignificant | insignificant | insignificant  | insignificant | insignificant | insignificant | insignificant | insignificant |
| Correlation coefficient (r)           | 0.9990        | 0.9998        | 0.9981        | 0.9999        | 0.9998        | 0.9986         | 0.9991        | 0.9864        | 0.9966        | 0.9996        | 0.9971        |
| Linearity range [µg/ml]               | 120 - 600     | 162 - 810     | 113 - 452     | 251 - 1255    | 100 - 500     | 146 - 730      | 174 - 870     | 830 - 4150    | 345 - 1725    | 200 - 1000    | 125 - 625     |
| Limit of Detection (LOD) [µg/mL]      | 34.029        | 19.940        | 39.887        | 24.886        | 12.875        | 46.144         | 45.246        | 488.753       | 161.755       | 36.449        | 57.006        |
| Limit of quantification (LOQ) [µg/mL] | 103.117       | 60.424        | 120.868       | 75.412        | 39.014        | 139.831        | 137.108       | 1481.069      | 490.166       | 110.452       | 172.745       |

S<sub>a</sub> - standard deviation of the slope; S<sub>b</sub> - standard deviation of the intersection point. t. calculated values of the Student's t-test. t<sub>α,f</sub> = 3.182 Critical values of the Student's test for degrees of freedom f = 3 and significance level α = 0.05.

Table S2. The content of active compounds

|    | flavan-3-ols |                   | quercetin      | flavanols         |              | phenolic acids  |                | flavanones   |                 | naringin | flavone         |
|----|--------------|-------------------|----------------|-------------------|--------------|-----------------|----------------|--------------|-----------------|----------|-----------------|
|    | catechin     | epicatechin       |                | rutin             | kaempferol   | caffeic acid    | hesperetin     | hesperidin   | naringenin      |          |                 |
| E1 | n/d          | 1335.95 ± 20.48   | 79.07 ± 32.07  | 28.55 ± 7.94      | 8.14 ± 4.90  | 129.69 ± 8.13   | 348.48 ± 11.68 | 10.17 ± 0.92 | 384.64 ± 12.92  | n/d      | 116.04 ± 49.68  |
| E2 | n/d          | 3587.01 ± 18.37   | 224.31 ± 13.46 | 2703.39 ± 674.78  | 13.79 ± 1.70 | 353.20 ± 2.22   | 129.70 ± 16.88 | 10.33 ± 0.52 | 219.39 ± 13.76  | n/d      | 410.64 ± 5.95   |
| E3 | n/d          | 1144.80 ± 183.28  | 71.33 ± 6.02   | 575.82 ± 345.59   | 1.93 ± 0.30  | 92.82 ± 52.23   | 20.24 ± 3.62   | 27.80 ± 0.13 | 4.47 ± 1.55     | n/d      | 125.42 ± 11.33  |
| E4 | n/d          | 3961.91 ± 82.39   | 263.09 ± 22.26 | 2449.25 ± 656.65  | 29.94 ± 3.02 | 436.80 ± 80.36  | 174.84 ± 25.07 | 12.14 ± 0.75 | 41.27 ± 15.00   | n/d      | 505.09 ± 80.54  |
| E5 | n/d          | 2961.28 ± 1475.93 | 176.56 ± 64.78 | 1711.42 ± 631.21  | 11.70 ± 8.07 | 296.58 ± 106.33 | 159.06 ± 14.06 | 24.40 ± 0.09 | 329.32 ± 462.02 | n/d      | 305.07 ± 124.84 |
| E6 | n/d          | 3485.18 ± 251.16  | 219.18 ± 2.69  | 2409.94 ± 209.47  | 5.30 ± 0.24  | 393.80 ± 45.70  | 24.45 ± 5.85   | 27.74 ± 0.01 | 42.89 ± 0.66    | n/d      | 374.85 ± 7.18   |
| E7 | n/d          | 2690.16 ± 5.50    | 197.58 ± 3.22  | 1914.89 ± 14.93   | 14.05 ± 2.52 | 321.63 ± 20.45  | 18.34 ± 1.52   | 23.15 ± 0.96 | 238.24 ± 4.05   | n/d      | 346.93 ± 5.31   |
| E8 | n/d          | 1298.95 ± 110.82  | 63.79 ± 23.62  | 825.97 ± 378.86   | 5.00 ± 1.80  | 141.44 ± 9.34   | 131.80 ± 21.75 | 28.45 ± 0.54 | 3.61 ± 1.45     | n/d      | 110.04 ± 41.31  |
| E9 | n/d          | 3238.25 ± 637.20  | 138.81 ± 81.45 | 1294.15 ± 1109.40 | 7.37 ± 1.27  | 318.12 ± 25.44  | 6.14 ± 2.39    | 33.73 ± 0.54 | 2.92 ± 3.44     | n/d      | 324.90 ± 36.31  |

n/d - non-detected

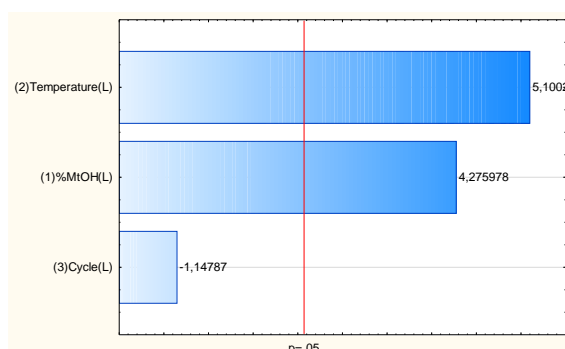

(a)

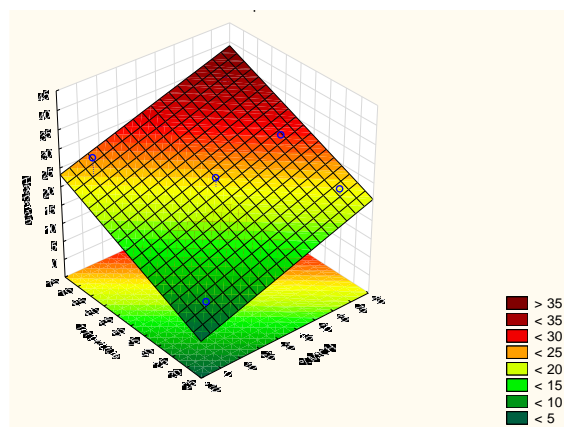

(b)

Figure S1. Statistical analysis for hesperidin content in extracts E1-E9: (a) Pareto plot of standardized effects for hesperidin content in extracts E1-E9; (b) Response surface plots presenting the dependence of methanol content in the extraction mixture and extraction temperature on the hesperidin content in extracts for constant number of extraction cycles at level 4.

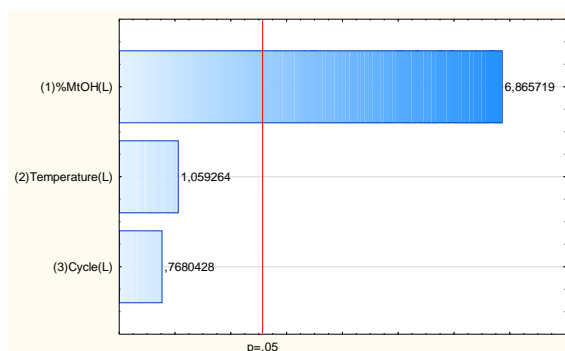

(a)

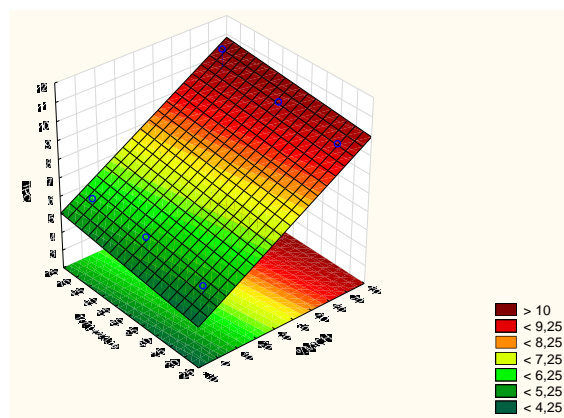

(b)

Figure S2. Statistical analysis for total phenolic content in extracts E1-E9: (a) Pareto plot of standardized effects for total phenolic content in extracts E1-E9; (b) Response surface plots presenting the dependence of methanol content in the extraction mixture and extraction temperature on the total phenolic content in extracts for constant number of extraction cycles at level 4.

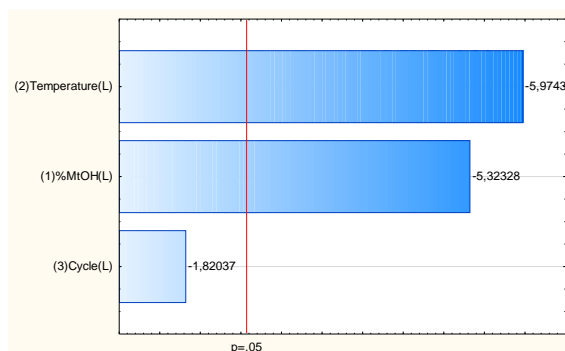

(a)

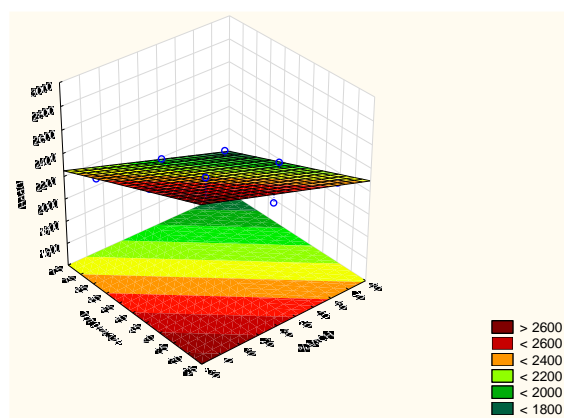

(b)

Figure S3. Statistical analysis for antioxidant activity of extracts E1-E9 measured by DPPH method: (a) Pareto plot of standardized effects for antioxidant activity; (b) Response surface plots presenting the dependence of methanol content in the extraction mixture and extraction temperature on antioxidant activity of extracts for constant number of extraction cycles at level 4.

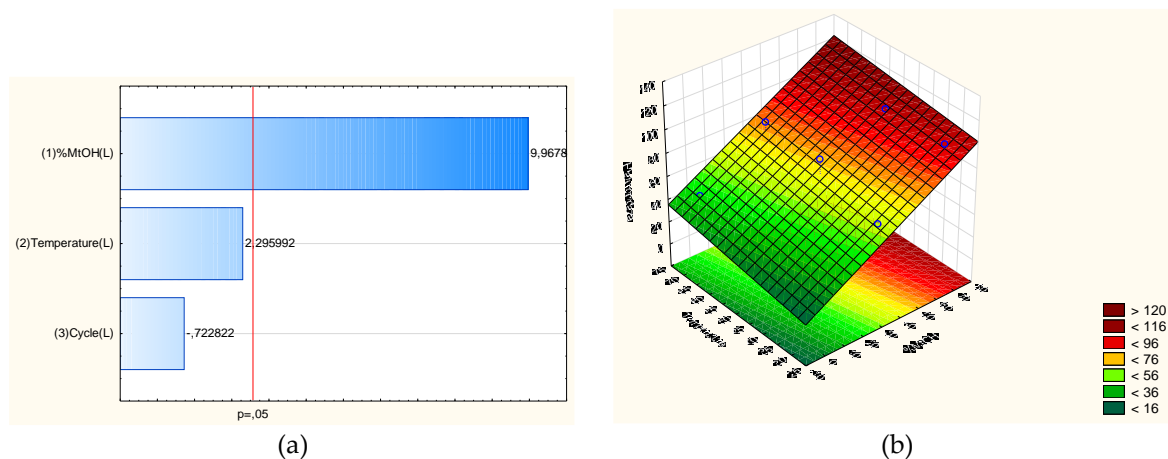

Figure S4. Statistical analysis for anti-inflammatory activity of extracts E1-E9: (a) Pareto plot of standardized effects for anti-inflammatory activity of extracts E1-E9; (b) Response surface plots presenting the dependence of methanol content in the extraction mixture and extraction temperature on anti-inflammatory activity of extracts for constant number of extraction cycles at level 4.

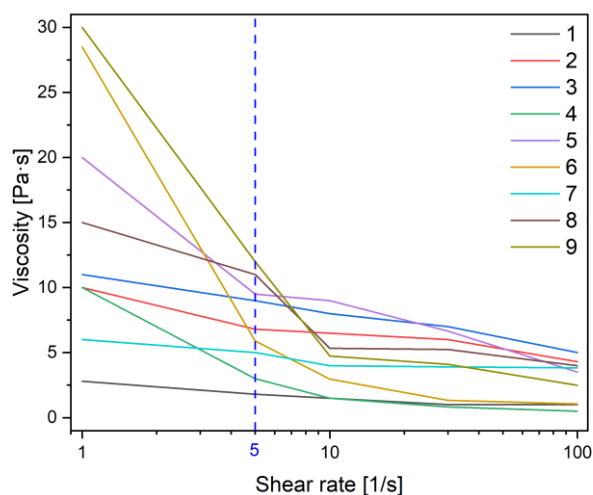

Figure S5. Rheological behavior of the prepared solutions for electrospinning – relationships between viscosities and shear rates.

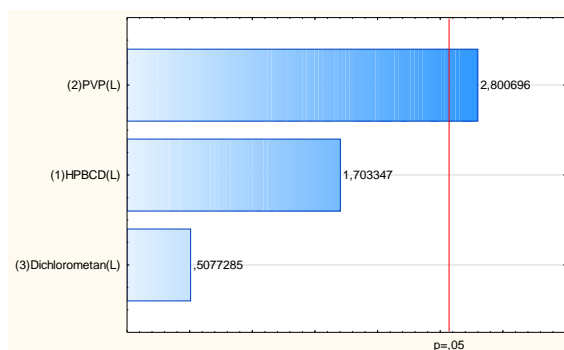

(a)

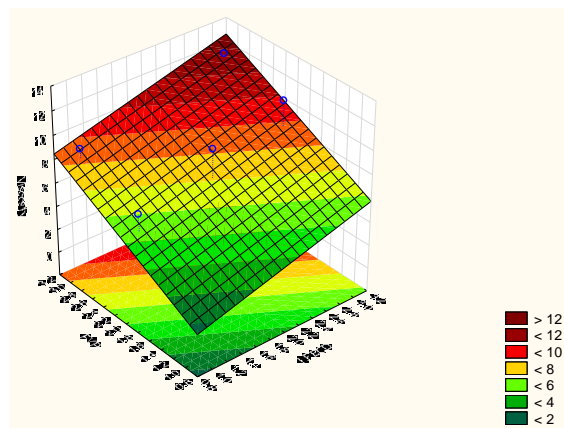

(b)

Figure S6. Statistical analysis for viscosities of the prepared solutions for electrospinning: (a) Pareto plot of standardized effects for viscosities of the prepared solutions for electrospinning; (b) Response surface plots presenting the dependence of HPβCD and PVP concentration on the viscosities of the prepared solutions for electrospinning for constant concentration of dichloromethane at level 25%.

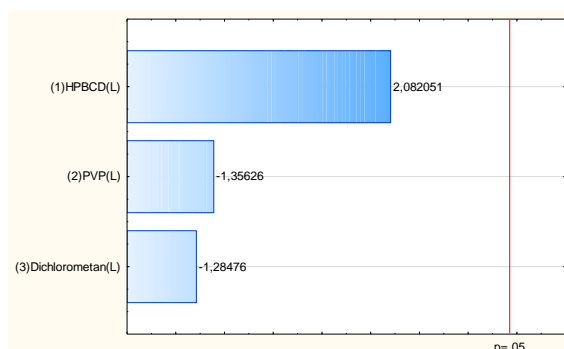

(a)

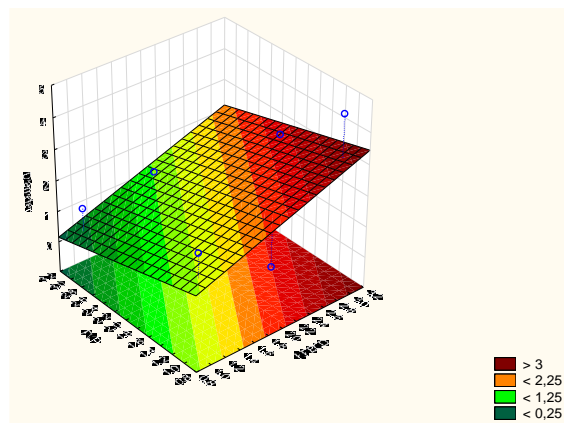

(b)

Figure S7. Statistical analysis for diameter of nanofibers: (a) Pareto plot of standardized effects for diameter of nanofibers N1-N9; (b) Response surface plots presenting the dependence of HPβCD and PVP concentration on the diameter of nanofibers for constant concentration of dichloromethane at level 25%.

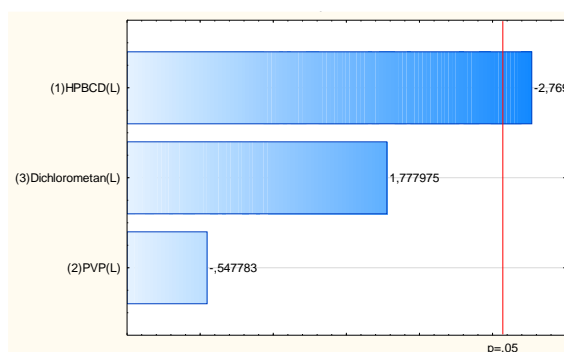

(a)

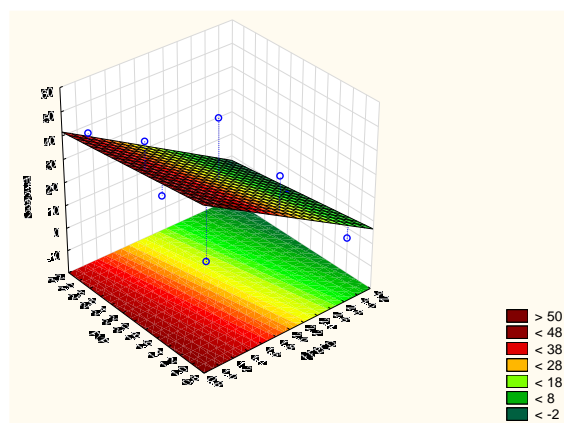

(b)

Figure S8. Statistical analysis for efficiency of nanofiber production: (a) Pareto plot of standardized effects for efficiency of nanofiber production N1-N9; (b) Response surface plots presenting the dependence of HP $\beta$ CD and PVP concentration on the efficiency of nanofiber production for constant concentration of dichloromethane at level 25%.

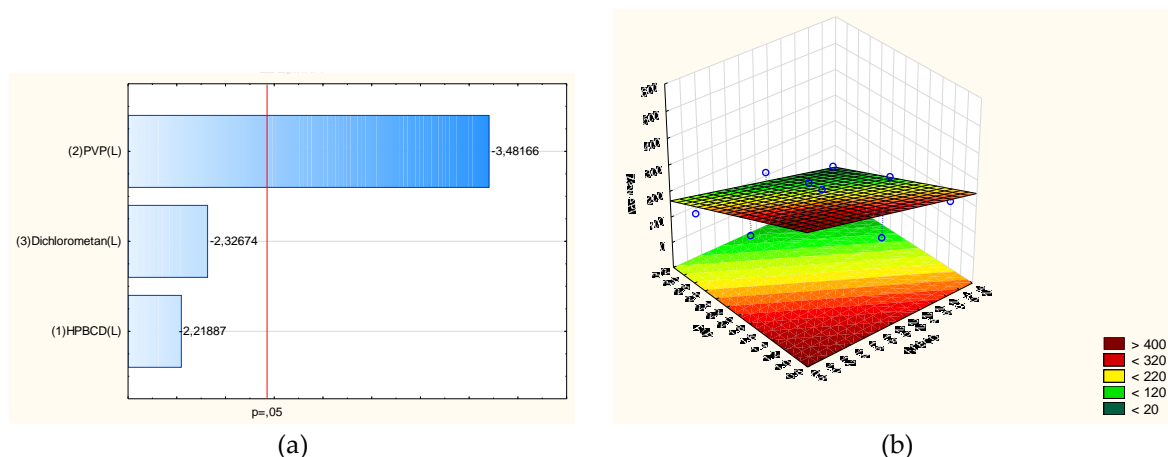

Figure S9. Statistical analysis for hesperidin content: (a) Pareto plot of standardized effects for hesperidin content in nanofibers N1-N9; (b) Response surface plots presenting the dependence of HP $\beta$ CD and PVP concentration on the hesperidin content for constant concentration of dichloromethane at level 25%.

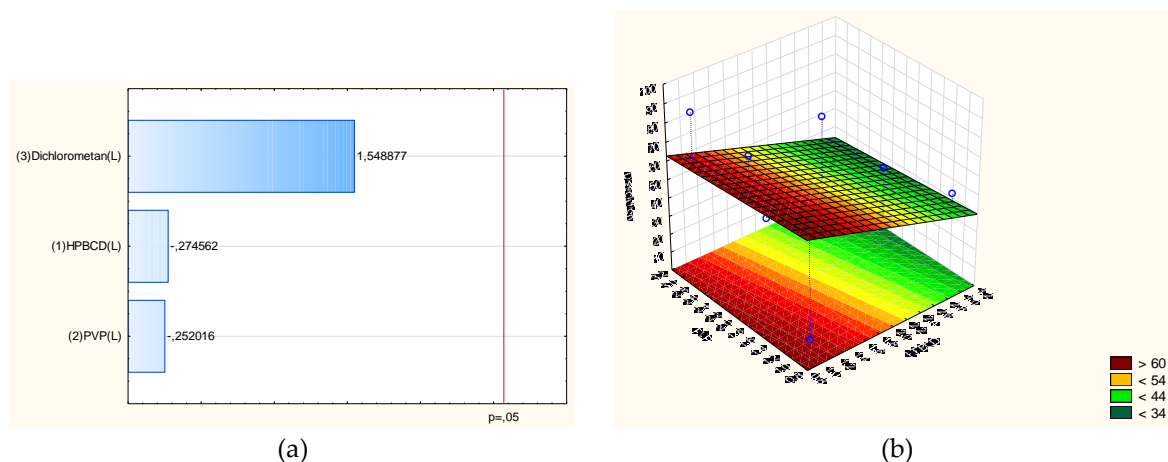

Figure S10. Statistical analysis for hesperidin dissolution: (a) Pareto plot of standardized effects for hesperidin dissolution in 2 minutes from nanofibers N1-N9; (b) Response surface plots presenting the dependence of HP $\beta$ CD and PVP concentration on the hesperidin dissolution for constant concentration of dichloromethane at level 25%.

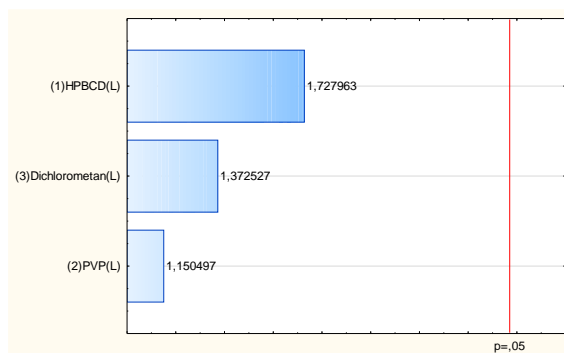

(a)

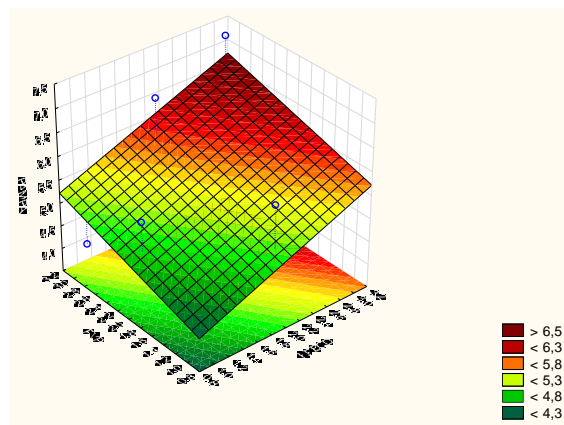

(b)

Figure S11. Statistical analysis for hesperidin permeability: (a) Pareto plot of standardized effects for hesperidin permeability from nanofibers N1-N9; (b) Response surface plots presenting the dependence of HPβCD and PVP concentration on the hesperidin permeability for constant concentration of dichloromethane at level 25%.

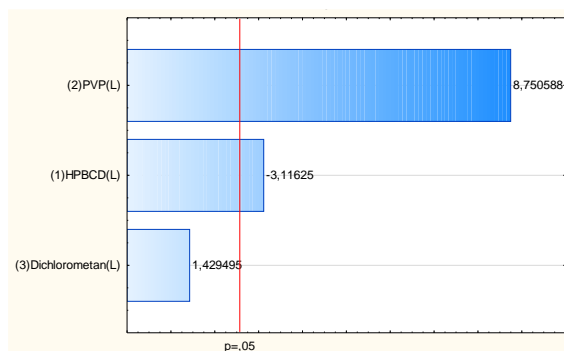

(a)

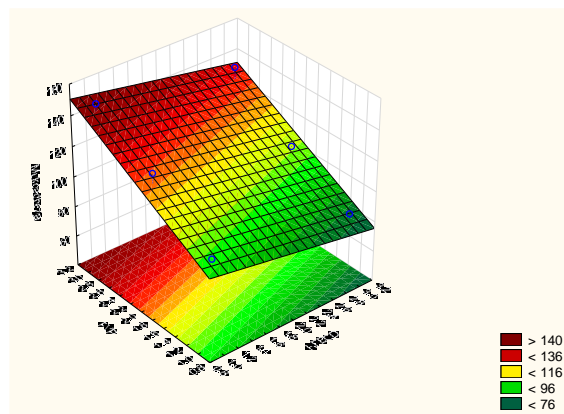

(b)

Figure S12. Statistical analysis for component of mucoadhesion: (a) Pareto plot of standardized effects for mucoadhesive properties of nanofibers N1-N9; (b) Response surface plots presenting the dependence of HPβCD and PVP concentration on the component of mucoadhesion for constant concentration of dichloromethane at level 25%.
